# Supplementary material for: Non-Psychrophilic Methanogens Capable of Growth Following Long-Term Extreme Temperature Changes, with Application to Mars
Source: MDPI journal article supplement (doi:10.3390/microorganisms6020034), 2018-04-23
Supplement: s1 [file s1]

## Survival of Non-psychrophilic Methanogens Exposed to Extreme Temperature Changes.

Rebecca L. Mickol<sup>1,2</sup>, Sarah K. Laird<sup>3</sup>, and Timothy A. Kral<sup>1,3</sup>

<sup>1</sup>Arkansas Center for Space and Planetary Sciences, University of Arkansas, Fayetteville, AR;

<sup>2</sup>American Society for Engineering Education, Washington, DC; <sup>3</sup>Dept. of Biological Sciences,

University of Arkansas, Fayetteville, AR; [rebecca.mickol@gmail.com]

### SUPPLEMENTARY FIGURES

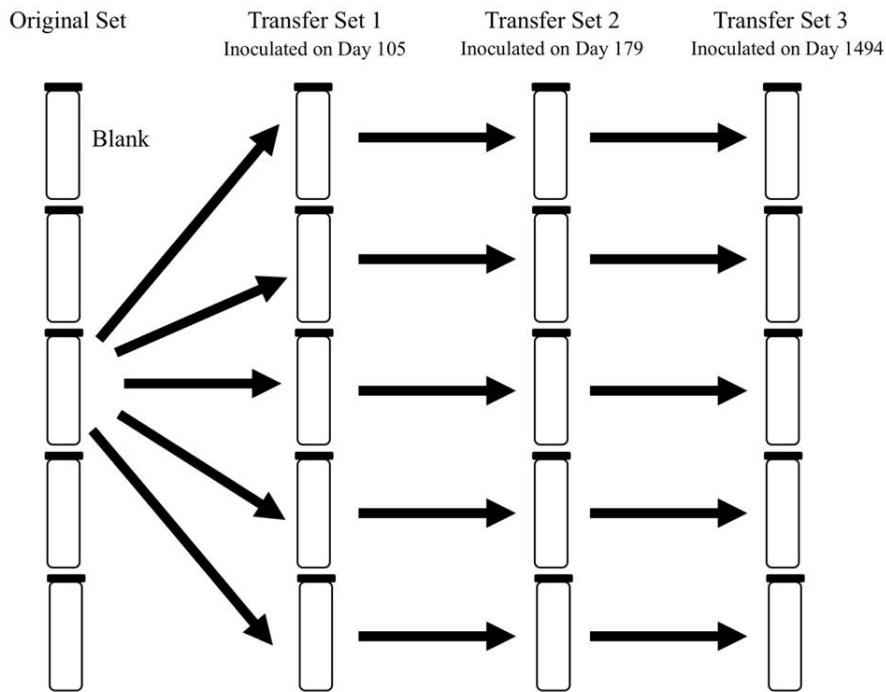

**Figure S1.** Inoculation scheme for Transfer Sets 1, 2, and 3 for cultures of *Methanothermobacter wolfeii* in Experiment 2 (5 g sand, 10 mL medium).

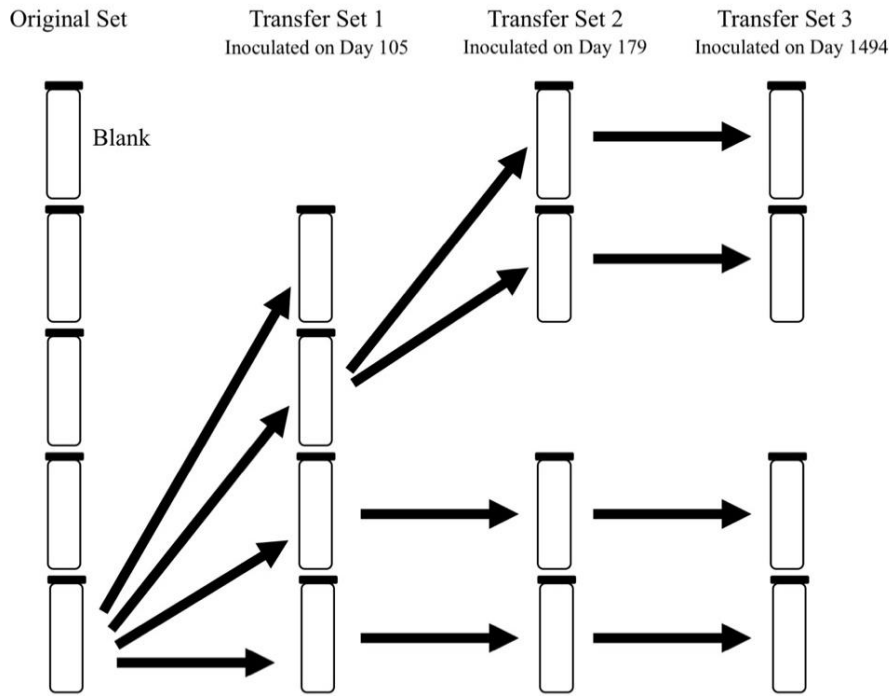

**Figure S2.** Inoculation scheme for Transfer Sets 1, 2, and 3 for cultures of *Methanobacterium formicicum* in Experiment 2 (5 g sand, 10 mL medium).

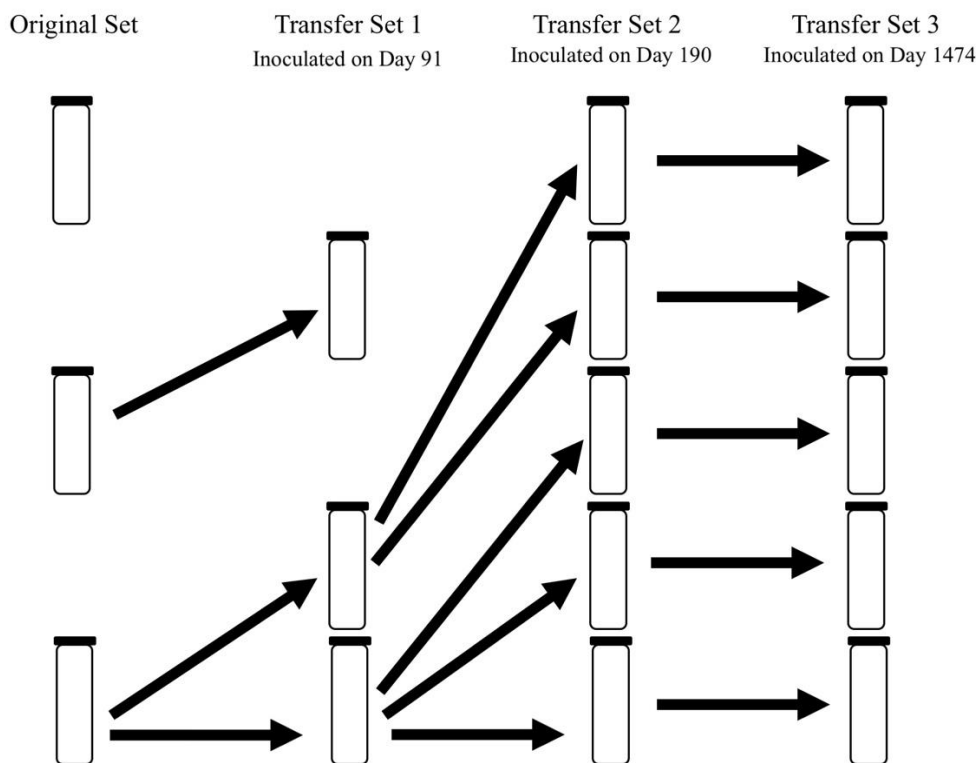

**Figure S3.** Inoculation scheme for Transfer Sets 1, 2, and 3 for cultures of *Methanothermobacter wolfeii* in Experiment 3 (10 g sand, 5 mL medium).

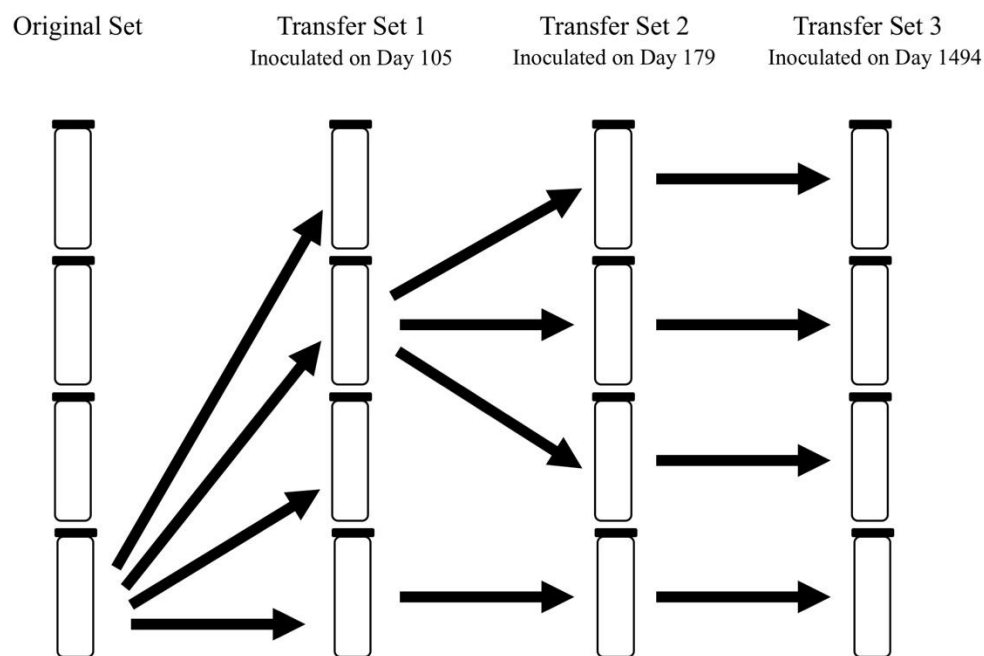

**Figure S4.** Inoculation scheme for Transfer Sets 1, 2, and 3 for cultures of *Methanobacterium formicicum* in Experiment 3 (10 g sand, 5 mL medium).

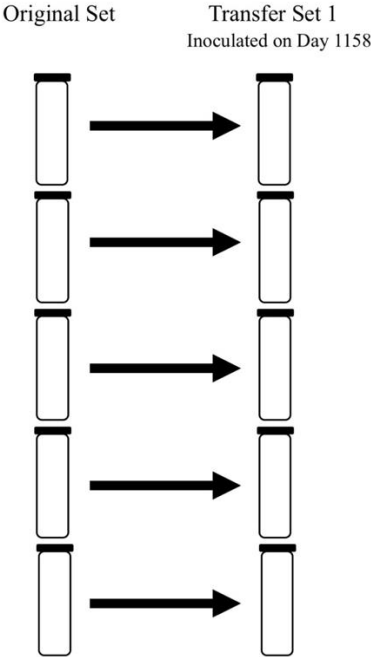

**Figure S5.** Inoculation scheme for Transfer Sets 1, 2, and 3 for cultures of *Methanobacterium formicum* and *Methanothermobacter wolfeii* in Experiment 4 (5 mL medium).
